1 **What's in the box? Authentication of *Echinacea* herbal products using DNA**  
2 **metabarcoding and HPTLC**

3  
4 Ancuta Cristina Raclariu<sup>a,b</sup>, Carmen Elena Tebrencu<sup>c,d</sup>, Mihael Cristin Ichim<sup>b</sup>, Oana  
5 Teodora Ciupercă<sup>c</sup>, Anne Krag Brysting<sup>e</sup>, Hugo de Boer<sup>a,\*</sup>

6  
7 <sup>a</sup> Natural History Museum, University of Oslo, P.O. Box 1172 Blindern, 0318 Oslo,  
8 Norway.

9 <sup>b</sup> Stejarul Research Centre for Biological Sciences, National Institute of Research and  
10 Development for Biological Sciences, Alexandru cel Bun Street, 6, 610004 Piatra  
11 Neamt, Romania.

12 <sup>c</sup> Research and Processing Center for Medicinal Plants Plantavorel S.A., Cuza Voda  
13 Street, 46, 610019, Piatra Neamt, Romania.

14 <sup>d</sup> Academy of Romanian Scientists, Splaiul Independentei, 54, 050094, Bucharest,  
15 Romania.

16 <sup>e</sup> Department of Biosciences, Centre for Ecological and Evolutionary Synthesis  
17 (CEES), University of Oslo, P.O. Box 1066 Blindern, 0316 Oslo, Norway.

18  
19 \*Corresponding author:

20 Hugo de Boer, Natural History Museum, University of Oslo, P.O. Box 1172 Blindern,  
21 0318 Oslo, Norway

22 Tel.: +47 22851875.

23 E-mail address: [hugo.deboer@nhm.uio.no](mailto:hugo.deboer@nhm.uio.no) (H. de Boer)

24  
25 **Word count: 6885**

26 **Abstract**

27 Background

28 Differences in regulatory policies between countries as well as a lack of appropriate  
29 standardized methods for authentication and quality control of herbal products lead to  
30 concerns over quality and safety. *Echinacea* products are among the top selling herbal  
31 products in Europe and the United States with indications for broad range of ailments.

32

33 Purpose

34 This study approached the need for a novel analytical strategy in authentication of  
35 herbal products.

36

37 Methods

38 A combination of high performance thin layer chromatography (HPTLC) and DNA  
39 metabarcoding was employed. Fifty-three *Echinacea* herbal products marketed across  
40 Europe were tested to evaluate the accuracy of these methods in plant identification  
41 and their potential in detecting substitutes, adulterants and other unreported plant  
42 constituents.

43

44 Results

45 HPTLC provides a high resolution in detecting *Echinacea* phytochemical target  
46 compounds, but does not offer information on the other species within the product.  
47 Alternatively, we showed that the limitation of HPTLC to detect non-targeted species  
48 can be overcome through the complementary use of DNA metabarcoding. Using  
49 DNA metabarcoding, *Echinacea* species were detected in 34 out of the 38 retained  
50 products (89 %), but with a lack of discriminatory resolution at the species level due  
51 to the low level of molecular divergence within the *Echinacea* genus. All herbal  
52 products showed considerable discrepancies between ingredients listed on the label  
53 and the ones detected using DNA metabarcoding registering an overall ingredient  
54 fidelity of 43 %.

55

56 Conclusion

57 The results confirm that DNA metabarcoding can be used to test for the presence of  
58 *Echinacea* and simultaneously to detect other species present in even highly  
59 processed and multi-ingredient herbal products.

60

61

62 **Keywords:** DNA metabarcoding, *Echinacea*, herbal pharmacovigilance, herbal  
63 products, HPTLC

64

65 **Abbreviations**

66 EMA, European Medicines Agency; BLAST, basic local alignment search tool; FTIR  
67 Fourier-transformed infrared spectroscopy; IR, infrared spectrometry; HPTLC, high  
68 performance thin layer chromatography; *matK*, maturase K; MS, mass spectrometry;  
69 MOTU, molecular taxonomic unit; nrITS, nuclear ribosomal internal transcribed  
70 spacer; Ph.Eur., European Pharmacopoeia; *rbcl*, ribulose biphosphate carboxylase;  
71 TLC, thin-layer chromatography; UV-VIS, ultraviolet-visible.

## 72 **1. Introduction**

73

### 74 **1.1 Legislation and *Echinacea***

75 The regulation of herbal products varies globally, and products can be classified as  
76 food supplements, medicines, homeopathic products, cosmetics or even biocides  
77 depending on specific legislation. The European Medicines Agency (EMA) regularly  
78 produces updates of the European Pharmacopoeias (EDQM, 2014) and in addition has  
79 produced a number of monographs on quality and authentication of specific herbals  
80 providing relevant methodological specifications for their quality assessment.  
81 However, the primary legal responsibility for the safety of the marketed products is  
82 delegated by default to the manufacturers.

83 Sales of herbal dietary supplements have seen year-on-year increases of 5-10  
84 %, and in 2014 sales reached an estimated total of more than \$6.4 billion, with  
85 *Echinacea* among the top five top grossing taxa (Smith et al., 2015). *Echinacea* is a  
86 genus of composites (Asteraceae) comprising a small number of herbaceous  
87 grasslands perennial taxa whose natural distribution is limited to North America  
88 (Kindscher and Wittenberg, 2016). Three *Echinacea* species, *E. angustifolia* DC.  
89 (Narrow-leafed purple coneflower), *E. pallida* (Nutt.) Nutt. (Pale purple coneflower)  
90 and *E. purpurea* (L.) Moench (Purple coneflower), are used in traditional herbal  
91 medicine (EDQM, 2014).

92 Today *Echinacea* is cultivated widely in Europe and North America for use in  
93 commercial herbal products in a diverse range of products, including herbal teas,  
94 capsules, tablets, powders, tinctures and beverages (Brown et al., 2011). A 2007  
95 survey by the National Centre for Complementary and Alternative Medicine showed  
96 that *Echinacea* was the most commonly used herbal medicine among adults and  
97 children in United States (Barnes et al., 2008). In Europe, a study on the use of food  
98 supplements and medicines showed that *Echinacea* and *Ginkgo* are the most common  
99 herbals (EAS, 2006).

100

### 101 **1.2 Pharmacological use and effects of *Echinacea* species**

102 *Echinacea* has been extensively studied for its pharmacological effects in both *in vitro*  
103 and *in vivo* studies (Table S1). *In vivo* human clinical studies on the oral  
104 administration of *E. purpurea* commercial herbal juice have failed to confirm  
105 previous *in vitro* findings (Schwarz et al., 2005, 2002; Sperber et al., 2004). However,  
106 a recent study conducted on 68,522 Norwegian women and their children revealed no  
107 risk of malformations or adverse pregnancy outcomes associated with the use of  
108 *Echinacea* in pregnancy (Heitmann et al., 2016).

109

### 110 **1.3 Chemical profiles and differences between *Echinacea* species**

111 The constituents of *Echinacea* species used for medicinal purposes differ qualitatively  
112 and quantitatively (Barnes et al., 2005; Binns et al., 2002). Alkamides,  
113 polysaccharides, glycoproteins, volatile oils and phenolic compounds have been  
114 considered important constituents of the plant (Table S2). *Echinacea purpurea* shows  
115 a similar phenolic phytochemical profile (cichoric acid, caftaric acid, chlorogenic  
116 acid) in roots, flower and leaves, but with no cynarine in the aerial parts, whereas *E.*  
117 *angustifolia* roots shows low amounts of cichoric acid and cynarine, and that of *E.*  
118 *pallida* shows both cichoric acid and cynarine. *Echinacea purpurea* aerial parts  
119 contain no echinacoside, while echinacoside is a major component in the roots of *E.*  
120 *pallida* and *E. angustifolia* (and also present in small quantities in the flower and  
121 leaves Alkamides are found in the rhizomes and roots of *E. angustifolia*, and less

122 abundantly in the aerial parts of *E. purpurea* and mainly absent in *E. pallida* roots). *E.*  
123 *pallida* contains large amounts of ketoalkenes. Rutoside is a flavonoid present in the  
124 leaves of all the three species of *Echinacea* (Barnes et al., 2005).

125

#### 126 **1.4 Quality issues of *Echinacea* herbal products**

127 The increased use of *Echinacea* species has led to concerns about adulterated  
128 products resulting from challenges in morphology-based identification, due to  
129 overlapping morphological variability and frequent hybridization between species  
130 (Flagel et al., 2008). Furthermore, reported adulteration of *E. purpurea* with the roots  
131 of *Parthenium integrifolium* L., *Lespedeza capitata* Michx., *Eryngium aquaticum* L.,  
132 *Rudbeckia nitida* Nutt., *Helianthus annuus* L. or *Liatris aspera* Michx. lead to safety  
133 concerns of the herbal products (Zhang et al., 2017). The use of unreported  
134 ingredients is a serious safety concern as adverse drug reactions cannot be associated  
135 to the product label and ingredients (Gilbert, 2011). Commercially available herbal  
136 products contain one or more *Echinacea* species originating from the same or  
137 different geographical areas, and the resulting phytochemical diversity across these  
138 products can complicate further investigations (Barnes et al., 2005). *Echinacea*  
139 secondary metabolites are used for the qualitative identification of species in the  
140 industry. Presence of for example, cichoric acid for *E. purpurea* and *E. angustifolia*,  
141 echinacoside for *E. angustifolia* and *E. pallida*, ketoalkene for *E. pallida* were  
142 routinely tested (Mistrikova and Vaverkova, 2006). Nevertheless, the presence of  
143 these markers does not provide unequivocal identification of the species since, for  
144 instance, traces of echinacoside can be also found in *E. purpurea* (Arnason et al.,  
145 2002). Presently, the differentiation of species is based on the relative abundances of  
146 metabolites by various phytochemical techniques, but marketed herbal products are  
147 often highly processed complex formulations with numerous ingredients, and these  
148 methods might not enable accurate identification of all plant ingredients, especially if  
149 target species are admixed with other species (De Boer et al., 2015).

150

#### 151 **1.5 DNA metabarcoding of herbal products and *Echinacea***

152 High phenotypic plasticity within *Echinacea* has complicated the taxonomy of the  
153 genus and led to misidentifications, confused taxonomies and misapplication of taxa  
154 (Kindscher and Wittenberg, 2016). Combined plastid (*trnS* and *trnG*) and nuclear  
155 (*Adh*, *CesA*, and *GPAT*) phylogenies found no resolved topologies, suggesting  
156 incomplete lineage sorting, as well as the potential for widespread hybridization and  
157 backcrossing following secondary contact within the genus (Flagel et al., 2008).  
158 Flagel et al. (2008) note that in contrast to the low discriminatory resolution of these  
159 molecular markers, previous studies using morphological characters and metabolic  
160 profiles found well-resolved and taxonomically supported relationships within  
161 *Echinacea*, and suggest the use of markers with more broad genomic coverage. Zhang  
162 et al. (2017) recovered the complete plastid genomes from all nine *Echinacea*  
163 species, and based on both coding and non-coding regions of the chloroplast  
164 genomes, *Echinacea* species were separated into two clades with strong support. In  
165 addition, Zhang et al. (2017) report that the core barcoding markers *matK* and *rbcL*  
166 do not differ sufficiently for species-specific identification of *Echinacea* but  
167 suggest a combination of nrITS and *trnH-psbA* as the optimal barcoding markers  
168 instead. The incongruence in nuclear ribosomal and plastid phylogenies, reported  
169 by Flagel et al. (2008), however suggests that neither plastid markers nor nrITS  
170 provide an accurate picture of the phylogenetic history of the genus.

171

172 In this study, we use DNA metabarcoding to detect species diversity in *Echinacea*  
173 herbal products. The use of DNA metabarcoding for the identification of  
174 commercialized plant products has evolved with advances in molecular biology and  
175 sequencing (Coghlan et al., 2012; Raclariu et al., 2017b), and is defined as high-  
176 throughput multispecies (or higher-level taxon) identification using the total and  
177 typically degraded DNA extracted from an environmental sample (Taberlet et al.,  
178 2012). Here we test the hypothesis that *Echinacea* species are frequently admixed  
179 with other species in *Echinacea* herbal products. We test this hypothesis by  
180 authenticating European *Echinacea* herbal products using DNA metabarcoding and  
181 HPTLC to authenticate these using phytochemical constituents, and aim to answer the  
182 following research questions: 1) Can DNA metabarcoding be used to test for the  
183 presence of *Echinacea* species in herbal products, and to detect the presence of off  
184 label plant species due to substitution or adulteration?; 2) Can HPTLC be used to  
185 distinguish *Echinacea* species and to identify its exclusive presence in herbal  
186 products?

187

188

## 189 **2. Materials and Methods**

190

191

### 191 **2.1 Sample collection**

192 Fifty-three herbal products listing different *Echinacea* species, marketed as single  
193 (35) and multi-ingredient (18) food supplements consisting in herbal teas (9 loose teas  
194 and 8 bagged teas), capsules (16), tablets (13) and extracts (7), were purchased from  
195 different retail stores (20), pharmaceutical companies (32) and via e-commerce (1).  
196 The countries of origin of these products were Austria (1), China (1), Czech Republic  
197 (3), France (1), Germany (4), Italy (2), Macedonia (1), Poland (2), Romania (26),  
198 Switzerland (1), United States (7), and four of the products did not specify a country  
199 of origin. A list of samples is included as Table S3, but the producer/importer name,  
200 lot number, expiration date and any other information that could identify the specific  
201 products and producers are omitted. These herbal products were imported into  
202 Norway for scientific analysis under Norwegian Medicines Agency license no.  
203 16/04551-2.

204

205

### 205 **2.2 High performance thin layer chromatography (HPTLC) analysis**

206 *Echinacea* phenylpropanoids (echinacoside, cynarin, cichoric acid, chlorogenic acid,  
207 caffeic acid, caftaric acid) from 53 herbal products were analyzed using HPTLC  
208 following recommendations in the specific monographs from the European  
209 Pharmacopoeia 8<sup>th</sup> Edition (EDQM, 2014) and the CAMAG application notes on  
210 HPTLC identification of *Echinacea* species (2015). Herbal products were processed  
211 depending on their pharmaceutical formulation. Capsules (about 300 mg), tablets (400  
212 mg), and teas (500 mg) were homogenized and mixed in a 1:100 ratio with  
213 methanol/water (80:20 V/V) in an ultrasonic bath for 15 min, and tinctures were  
214 diluted in 1:3 methanol. The obtained solutions were centrifuged and the filtered  
215 supernatant was collected and used as sample for further analysis. The following  
216 chemical and botanical standards were used. *Reference substances*: caftaric acid  
217 (HPLC grade, Carl Roth GmbH + Co. KG, Karlsruhe, Germany), cynarine (min. 98.0  
218 %, HPLC/Sigma-Aldrich Co, St. Louis, Missouri, USA), cichoric acid (min. 95.0 %,  
219 Sigma-Aldrich, St. Louis, Missouri, USA), echinacoside (min. 98.0 % HPLC, Sigma-  
220 Aldrich Co, St. Louis, Missouri, USA), chlorogenic acid (min. 95.0 %, Sigma-  
221 Aldrich), caffeic acid (TLC grade, Carl Roth GmbH + Co. KG, Karlsruhe, Germany),



222 verbascoside (min. 99.0 % HPLC, Extrasynthese SAS, Lyon, France), ferulic acid  
223 (min. 99.0 %, Sigma-Aldrich, St. Louis, Missouri, USA). *Solvents*: ethanol, min. 96  
224 % V/V, and methanol, 99.3 % analytical reagent (Chimreactiv SRL, Bucharest,  
225 Romania). *Analytical reagents*: formic acid ACS (Merck KGaA, Darmstadt,  
226 Germany), ethyl acetate (min. 99.5 %, Sigma-Aldrich Co, St. Louis, Missouri, USA),  
227 distilled water prepared in laboratory; natural products – polyethylene glycol  
228 (NP/PEG) reagent (Honeywell Fluka, Seelze, Germany). *Botanical standards*: United  
229 States Pharmacopoeia (USP) analytical reference botanical standards: USP Powdered  
230 *Echinacea purpurea* F0D018, USP Powdered *Echinacea angustifolia* G0I377 and  
231 USP Powdered *Echinacea pallida* F0I285 (Rockville, Maryland, USA). *Apparatus*: A  
232 CAMAG high performance thin layer chromatography system (CAMAG AG,  
233 Muttenz, Switzerland), with a Linomat IV sample applicator, a Canon digital camera,  
234 and the following software, Reprostar III with winCATS planar chromatography  
235 manager software, Digistor II digital system with winCATS software with an Image  
236 Comparison Viewer enabling high resolution visualization of multiple samples for  
237 comparison of specific compound retention times and the included references.

238 Samples and references were analyzed on Silica gel HPTLC plates (60 F245  
239 20x10 and 10x10 cm for tinctures and solutions, Merck KGaA, Darmstadt, Germany).  
240 The reference solutions were dissolved in methanol to obtain the following  
241 concentrations: caftaric acid 0.006 %, cynarine 0.02 %, cichoric acid 0.005 %,  
242 echinacoside 0.018 %, chlorogenic acid 0.015 %, caffeic acid 0.011 %, verbascoside  
243 0.01 %, ferulic acid 0.01 %, USP Powdered *Echinacea purpurea* F0D018 1.0 %, USP  
244 Powdered *Echinacea angustifolia* G0I377 2.0 % and USP Powdered *Echinacea*  
245 *pallida* F0I285 1.0 %. *Echinacea* product sample extracts and reference solutions  
246 were applied separately in twin bands, on maximum 12 tracks at 4-8 mm distance  
247 using different application volumes (4-16 µl for extracts, 12-17 µl for bag and bulk  
248 teas, 12-17 µl for tablets, 9-15 µl for capsules and 3-6 µl for standard solutions) with  
249 a band length of 8-10 mm and a delivery speed of 8 s/µl using a CAMAG Linomat IV  
250 automatic sample applicator (see above). The plates were run for 30 min in the  
251 developing box and subsequently dried at 105 °C for 5 min. For phenylpropanoids  
252 identification, the plates were inspected at 254 and 366 nm before and after  
253 homogenous spraying with the Natural products-polyethylene glycol reagent  
254 (NP/PEG), and subsequently air dried. For each set of samples, the plates were  
255 developed in a saturated vertical-developing chamber at room temperature (20-22 °C)  
256 for 30 min with ethyl acetate:formic acid:acetic acid:water = 20:2.2:2.2:5.4 V/V as  
257 mobile phase; the development distance was 7 cm; after the development, the plates  
258 were air dried at room temperature. Derivatization of the chromatograms were  
259 performed by spraying the plates with NP (0.1 g in 10 ml methanol) and PEG 400  
260 (0.5 g in 10 ml ethanol), followed by heating of the plates at 105 °C temperature for  
261 15 min. Plates were subsequently imaged using a CAMAG Reprostar 3 with digital  
262 video camera at 254 nm for developed plates and 366 nm for derivatized plates.  
263 HPTLC densitometry (CAMAG- TLC Scanner 3 with WinCATS Planar  
264 Chromatography Manager Software) was done using spectra recording from 200-700  
265 nm, absorption at 254 nm wavelength, slit dimension 8.00 x 0.40 mm, scanning speed  
266 100 nm/s, and peak area evaluation by linear or polynomial regression.

267

### 268 **2.3 DNA metabarcoding**

269 The total DNA was extracted from small amounts (about 300 mg) of each  
270 homogenized herbal product or silica gel dried leaves, using the method described in  
271 Raclariu et al. (2017b). Amplicon DNA metabarcoding using barcoding markers

nrITS1 and nrITS2 was done using the exact method described in Raclariu et al. (2017b), and sequenced on an Ion Torrent Personal Genome Machine (Life Technologies, Thermo-Fischer Scientific, USA). Sequencing read data was processed using the HTS barcode-checker pipeline (Lammers et al., 2014) as described in Raclariu et al. (2017b). A 99 % sequence similarity threshold was used for MOTU clustering with a minimum of 10 reads per cluster to reduce the formation of false MOTUs and the potential effects of sequencing bias known to affect the Ion Torrent sequencing platform (Loman et al., 2012). One representative sequence from each MOTU was taxonomically assigned using the Basic Local Alignment Search Tool (BLAST) (Altschul et al., 1990) against a reference nucleotide sequence database represented by a local copy of the NCBI/GenBank. BLAST results with a maximum e-value of 0.05, a minimum hit length of 100 bp, and similarity of > 99 % against the reference barcode were accepted as species level matches.

285

286

### 287 3. Results

288

#### 289 3.1 High performance thin layer chromatography (HPTLC)

290 Identification and detection of *Echinacea* species, *E. purpurea*, *E. angustifolia* and *E.*  
291 *pallida*, from tea, tablets, capsules, and extracts were done using HPTLC with the  
292 standard *Echinacea* phenylpropanoid references echinacoside, cichoric acid, caftaric  
293 acid, chlorogenic acid, and cynarine, and the botanical standards of *E. purpurea*, *E.*  
294 *angustifolia*, *E. pallida*. In the HPTLC chromatograms visualized at 366 nm after  
295 derivatization, the occurrence of fluorescent blue spots indicates the presence of  
296 phenylpropanes (Figure 1). The phenylpropanoid refraction (Rf) values were: 0.15-  
297 0.17 (echinacoside), 0.47-0.49 (chlorogenic acid), 0.51-0.53 (caftaric acid), 0.65  
298 (cynarine), 0.87-0.9 (cichoric acid), 0.96-0.97 (caffeic acid), and other polyphenols  
299 (ferulic acid and verbascoside) at Rf = 0.35; 0.46; 0.52; 0.73 and 0.90.

300

301 **[INSERT] Figure 1.** High performance thin layer chromatogram (HPTLC) based  
302 identification and detection of phenylpropanoids from the *Echinacea* sp. herbal  
303 products. The track assignment: (1) test solutions (1-53) (2) phenylpropanoids  
304 chemical reference solutions in the following order (increasing Rf): echinacoside,  
305 chlorogenic acid, caftaric acid, cynarin, cichoric acid, caffeic acid; (3) botanical  
306 reference solution of *Echinacea purpurea* (root (MNR1) and aerial parts (MH1)) (4)  
307 United States Pharmacopoeia (USP) analytical reference botanical standards (*E.*  
308 *purpurea* (Spu), *E. angustifolia* (SA) and *E. pallida* (SP)) **A.** HPTLC chromatograms  
309 of herbal teas. **B.** HPTLC chromatograms of capsules. **C.** HPTLC chromatograms of  
310 tablets. **D.** HPTLC chromatograms of extracts. The chromatograms were scanned  
311 after derivatization in UV 366 nm. Details about the herbal products can be found in  
312 the Table S3.

313

314 The results of HPTLC chromatographic identifications of the analysed herbal  
315 teas yielded the following results for the 10 samples labelled as including *Echinacea*  
316 sp. (Figure 1A and Table S4): Sample #1 doesn't contain any of the targeted  
317 phenylpropanoids specific to *Echinacea* species; sample #8 has caffeic acid and low  
318 caftaric acid and content suggesting that only *E. purpurea* is present and in low  
319 concentration; sample #12 has very strong zones for echinacoside, cichoric acid and  
320 caftaric acid indicating a mixture of *E. purpurea* and *E. pallida*; seven samples  
321 (samples #4, #6, #9, #10, #11, #13, and #14) show distinct presence of caftaric and

322 cichoric acid indicating presence of *E. purpurea*. The six samples labelled as  
323 including specifically *E. purpurea* yielded the following: in four samples (samples #3,  
324 #15, #16, #17) the presence of this species was confirmed by high content of caftaric  
325 and cichoric acid; in sample #2 low content cichoric and caffeic acid suggests a low  
326 concentration of *E. purpurea*; in sample #7 the presence of caftaric acid and a  
327 comparison of the profile with that of the botanical standard *E. angustifolia* (Figure  
328 1A) indicates a mixture of *E. purpurea* and *E. angustifolia*. In sample #5 *E. purpurea*  
329 was identified from the distinct presence of cichoric and caftaric acid.

330 The results of the HPTLC chromatographic identifications of the analysed  
331 capsules yielded the following (Figure 1B and Table S4): The three samples labelled  
332 as including *Echinacea* sp. (#18, #31, #32) contained caftaric acid and cichoric acid,  
333 and this confirmed the presence of *E. purpurea*. In the nine samples labelled as  
334 including specifically *E. purpurea* (samples #19, #22, #23, #26, #27, #28, #29, #30,  
335 #33) the content of cichoric acid and caffeic acid confirmed the presence of this  
336 species, except for sample #29. In sample #21 labelled as including *E. angustifolia* the  
337 detection of echinacoside and cichoric acid and the comparison of the profile with that  
338 of the botanical standard *E. angustifolia* (Figure 1B) indicates the presence of a  
339 mixture of *E. angustifolia* and *E. purpurea*. In sample #24 labelled as including *E.*  
340 *pallida* the presence of echinacoside and cichoric acid and the comparison of the  
341 profile with that of the botanical standard *E. pallida* indicates the presence of a  
342 mixture of *E. pallida* and *E. purpurea* (Figure 1B). In samples #20 and #25 labelled  
343 as including mixtures of *E. purpurea* and *E. angustifolia*, the presence of these  
344 species was confirmed by the content of echinacoside, caftaric acid, cichoric acid and  
345 caffeic acid.

346 The results of the HPTLC chromatographic identifications of the analysed  
347 tablets yielded the following (Figure 1C and Table S4): The two samples labelled as  
348 including *Echinacea* sp. (samples #36, #46) differ in their chromatographic profiles.  
349 Sample #36 differs from that of the *Echinacea* species, and sample #46 contains  
350 caffeic acid and cichoric acid indicating the presence of *E. purpurea*. For the eleven  
351 samples labelled as including *E. purpurea* (samples #34, #35, #37, #38, #39, #40,  
352 #41, #42, #43, #44, #45) the presence of this species was confirmed in eight samples  
353 by the presence of caffeic acid and cichoric acid, and the presence of the  
354 echinacoside, caftaric acid and cichoric acid indicated a mixture of *E. purpurea* and  
355 *E. pallida* in sample #40, as well as a low concentration of *Echinacea* in sample #41.  
356 In sample #42 no *Echinacea* was identified.

357 The results of the HPTLC chromatographic identifications of the analysed  
358 extracts yielded the following (Figure 1D and Table S4): Of the five samples labelled  
359 as including *E. purpurea* (samples #47, #49, #51, #52, #53), sample #47 was a  
360 glycerinated solution and this hampered an accurate composition estimation, sample  
361 #53 contained very weak zones for echinacoside, caftaric acid and cichoric acid that  
362 may indicate the presence of *E. angustifolia*, and the presence of cichoric acid and  
363 caftaric acid in the other samples confirmed the presence of *E. purpurea*, however  
364 sample #49 do not allow an accurate estimation. Sample #48 labelled as including *E.*  
365 *purpurea* and *E. angustifolia* was also a glycerinated solution. Sample #50 labelled as  
366 including *E. pallida* confirms the presence of this species.

367

### 368 **3.2 DNA metabarcoding**

369 All 53 samples had detectable DNA concentrations but the results varied from sample  
370 to sample. Fifteen samples had a concentration lower than 0.1 ng/μl, 26 samples  
371 ranging from 0.1 to 10 ng/μl, and twelve higher than 10 ng/μl. No correlation between



372 obtained DNA concentration and the substrate type of the extracted product was  
373 observed (Table S5).

374 The raw data before demultiplexing consisted of 12,190,865 sequences, with  
375 an average of 115,008 sequences per sample for each marker. After applying our  
376 trimming and filtering quality criteria, 38 herbal products (72 %) were retained, and  
377 they were used for further analysis (Table S6). Fifteen products, including three  
378 herbal teas (2, 7, 12) three capsules (19, 21, 29), five tablets (35, 36, 40, 43, 44) and  
379 four extracts (47, 50, 51, 53) did not yield reads or MOTUs after applying the quality  
380 filtering criteria and were excluded from further analyses. A total of 305,018  
381 sequences passed the trimming and filtering quality criteria (2.5 % of reads),  
382 including 79,918 nrITS1 reads and 225,100 nrITS2 reads (Table S6). The MOTUs  
383 were formed using a 99 % similarity clustering threshold, and 2,529 MOTUs that  
384 contained minimum 10 reads were retained and further identified using BLAST as 83  
385 different species (Table S7). For nrITS1 we detected a total of 60 different species  
386 and 37 species on only nrITS2 (Table S7). For both, nrITS1 and nrITS2, the number  
387 of species detected per sample ranged from 1 to 19, with an average of 5 species per  
388 sample.

389  
390 **[INSERT] Figure 2.** Detection of *Echinacea* sp. using DNA metabarcoding within  
391 the herbal products per category of pharmaceutical form.

392  
393 The targeted *Echinacea* species were detected in 34 out of 38 products (89 %)  
394 of the retained samples (Figure 2 and Table S8). Twenty-four (89 %) out of 27  
395 analysed products labelled as including *Echinacea* sp. as the single ingredient,  
396 contained at least one *Echinacea* species. However only seven (26 %) contained  
397 exclusively *Echinacea* species, whereas the other 20 contained several other species,  
398 likely contaminants. Ten (91 %) out of 11 analysed products labelled as including a  
399 mixture of *Echinacea* sp. and other plant species, contained *Echinacea* sp. but all of  
400 them showed considerable discrepancies between ingredients listed on the label and  
401 the ones detected. The overall ingredient fidelity, meaning the proportion of the  
402 number of species indicated on the product label and the entire species diversity, as  
403 detected by DNA metabarcoding, was 89 % for single ingredient products and 31 %  
404 for the multiple ingredient products. The overall ingredient fidelity for all products  
405 was 43 %.

406 Per formulation category the DNA metabarcoding yielded the following  
407 results (cf. Figure 2 and Table S8): In thirteen out of 17 samples the presence of  
408 *Echinacea* sp. was confirmed, and in the remaining four samples, three did not yield  
409 MOTUs that passed the quality filtering criteria. The capsules contained *Echinacea*  
410 sp. in twelve out of 16 samples, and identification was not possible in four of the  
411 products because these did not yield MOTUs that passed the quality filtering criteria.  
412 The herbal tables contained *Echinacea* sp. in only six out of 13 samples, and in the  
413 remaining seven samples five did not yield MOTUs that passed the quality filtering  
414 criteria. The extracts contained *Echinacea* sp. in only three out of seven samples, and  
415 the remaining four did not yield MOTUs that passed the quality filtering criteria.

416  
417

#### 418 **4. Discussion**

419 The quality and authenticity of herbal products have direct impacts on their safety.  
420 Quality control must include a series of procedures to ensure the identity of the used  
421 raw materials and screening of target compounds along the value chain.

422 Authentication assays in herbal production must discriminate potential adulterants  
423 and/or substitutes. However, despite the existence of well-established and widely  
424 accepted analytical methods recommended in the regulatory guidelines (EDQM,  
425 2014; EMA, 2006) for herbal product quality assessment, their resolution and efficacy  
426 can be impeded by various factors. First, the finished herbal products are often highly  
427 processed with numerous ingredients, and even if these analytical methods are  
428 accurate in detecting specific target compounds, they have limited efficiency in  
429 detecting infrageneric substitution and do not yield any information on other plant  
430 ingredients in the products (Rossi Forim et al., 2015). Morphology based taxonomic  
431 methods are equally impeded by highly processed herbal products as these often  
432 constitute of finely powdered materials (Zhao et al., 2006).

433 In this study, we combined HPTLC and DNA metabarcoding. HPTLC is an  
434 more automated and reproducible form of thin-layer chromatography (TLC), and with  
435 a better separation and detection of the compounds that can be successfully used in  
436 quality control of raw materials and finished herbal products (Reich and Widmer,  
437 2008). Reich et al. (2008) summarized a procedure for HPTLC based identification of  
438 *Echinacea* and other species, which was applied on 53 herbal products in this study,  
439 including herbal tea, capsules, tablets and tinctures. The results showed that each of  
440 the three targeted *Echinacea* species have distinguishable chromatograms within most  
441 of the herbal products (Figure 1). The main limitation of the HPTLC assay is the  
442 inability to offer insights on the presence of other plant species in the herbal product.  
443 HPTLC is less suitable for the analysis of volatile and certain sensitive samples  
444 (Morlock and Schwack, 2010). Combination of HPTLC with methods, such as mass  
445 spectrometry (MS), ultraviolet–visible (UV-VIS) and infrared spectrometry (IR) or  
446 Fourier-transformed infrared spectroscopy (FTIR) offer further possibilities for  
447 analytical refinement in the analysis of herbal products by increasing the amount of  
448 qualitative and quantitative information. In summary, HPTLC is not the most  
449 adequate method for detection of substitution and adulteration within marketed herbal  
450 products, but it is a powerful and cost-effective method to identify specific  
451 chemotaxonomic markers, and thus applicable in the quality control of the derived  
452 herbal products.

453 DNA barcoding and metabarcoding are not yet validated for use in a  
454 regulatory context of quality control (Agapouda et al., 2017), but there are several  
455 studies advocating its usefulness for herbal product authentication and  
456 pharmacovigilance (Cheng et al., 2014; Coghlan et al., 2012; Ivanova et al., 2016;  
457 Newmaster et al., 2013; Raclariu et al., 2017b, 2017a). The DNA metabarcoding  
458 results in this study show that the presence of *Echinacea* sp. was detected in 34 (89  
459 %) out of 38 sequenced and retained samples. However, the results showed a lack of  
460 discriminatory resolution at the species level likely due to the low level of molecular  
461 divergence (Flagel et al., 2008; Zhang et al., 2017). Furthermore, most of the retained  
462 samples revealed a high level of discrepancy with most products not containing all the  
463 species listed on the label, but rather other off-label species. For all products, only 43  
464 % of the species indicated on the product's label were detected species using DNA  
465 metabarcoding. Here we need to mention that the general monograph number 1433 on  
466 'Herbal drugs' of the European Pharmacopoeia allows up to 2 % foreign matter  
467 (EDQM, 2014), and that DNA metabarcoding is not a quantitative method that can be  
468 used to check if the contaminants are within this allowed range. As suggested by  
469 previous studies (Ivanova et al., 2016; Raclariu et al., 2017a), the results related to the  
470 authentication of herbal products using DNA metabarcoding need to focus primarily  
471 on checking the presence of the labeled ingredients and contaminants. The presence

472 of non-listed species may be explained by various factors, including but not limited to  
473 the deliberate adulteration and unintentional substitution, that may occur starting from  
474 the early stage of the supply chain (i.e., cultivation, transport, storage), to the  
475 manufacturing process and the commercialization of the final products. DNA  
476 metabarcoding is a highly sensitive method and even traces of DNA, from grains of  
477 pollen from anemophilous species, for instance, or from plant dust in the entire  
478 manufacturing process that may accidentally contaminate the product, can be detected  
479 and identified (Raclariu et al., 2017b, 2017a). Several factors may influence the  
480 accuracy of the final results, starting with the first steps in processing the raw material  
481 to the final data analysis and interpretation. Extraction procedures, barcoding markers,  
482 primers, PCR amplification bias, high throughput sequencing library preparation,  
483 sequencing platform and trimming and filtering quality thresholds, clustering, and  
484 molecular identification algorithm all influence the final results (Pawluczyk et al.,  
485 2015; Staats et al., 2016). Moreover, public sequence reference databases, such as  
486 NCBI Genbank, pose significant challenges for reliable taxonomic affiliations, due to  
487 incorrectly identified or missing reference sequences and high levels of missing data  
488 (Hinchliff and Smith, 2014). However, at least one reference sequence of almost each  
489 genus of the known land plant is represented in NCBI GenBank (Hinchliff and Smith,  
490 2014) and thus the use of DNA metabarcoding should be possible at least for  
491 identification at higher taxonomic levels.

492 As molecular genetics and sequencing technology advances, the use of DNA  
493 metabarcoding is promising for large-scale authentication of herbal products and  
494 other mixtures of economical importance. Standardization is required before DNA  
495 metabarcoding can be implemented as a routine analytical approach (Agapouda et al.,  
496 2017; Staats et al., 2016). Although, DNA metabarcoding is beneficial to authenticate  
497 species and study species diversity in complex mixture, it does not provide other  
498 essential information on target compound presence and concentration or the presence  
499 of chemical contaminations such as heavy metals, allergenic dyes and synthetic  
500 pharmaceuticals.

501  
502

## 503 **5. Conclusions**

504 The increasing use of herbal medicines needs to be accompanied by an enhanced  
505 method for comprehensive quality control that are adequate for all the stages of the  
506 supply chain, starting from the cultivation of the raw material to the marketed herbal  
507 product. The results of our study show that HPTLC is a reliable analytical tool for  
508 routine use to identify and distinguish *Echinacea* species in herbal products. It allows  
509 for better separation and a course quantification of chemical constituents, but it has a  
510 limited resolution in detecting the presence of other species within the product. Here,  
511 we show that this limitation can be overcome through the complementary use of DNA  
512 metabarcoding that simultaneously confirms both the presence of the target species  
513 and of all other species, in even highly processed and multi-ingredient herbal  
514 products. Advances in sequencing technology advances make the use of DNA  
515 metabarcoding promising for large-scale authentication of herbal products.  
516 Nevertheless, standardization is required before it can be implemented as a routine  
517 complementary analytical method for regulatory quality control and herbal  
518 pharmacovigilance.

519

## 520 **Acknowledgments**

521 The authors wish to thank the NHM head engineers Birgitte Lisbeth Graae Thorbek  
522 and Audun Schröder-Nielsen and the DNA lab manager Jarl Andreas Anmarkrud for  
523 the technical help and assistance with the genetic analyses. Iulia Chilat and Elena  
524 Iacob are acknowledged for their technical help and assistance with the  
525 phytochemical analyses.

526

527 **Funding:** This work was supported by the Romanian - EEA Research Programme  
528 operated by the MECS-ANCSI PO under the EEA Financial Mechanism 2009-2014  
529 and project contract number 2SEE/2014.

530

531 **Conflicts of interest:** The authors declare no conflict of interests.

532

### 533 **Supporting information**

534 Ion-Torrent amplicon read data is deposited in DRYAD [doi pending acceptance]

535

### 536 **References**

- 537 1. Agapouda, A., Booker, A., Kiss, T., Hohmann, J., Heinrich, M., Csupor, D., 2017.  
538 Quality control of *Hypericum perforatum* L. analytical challenges and recent  
539 progress. J. Pharm. Pharmacol. doi:10.1111/jphp.12711
- 540 2. Altschul, S.F., Gish, W., Miller, W., Myers, E.W., Lipman, D.J., 1990. Basic local  
541 alignment search tool. J. Mol. Biol. 215, 403–410. doi:10.1016/S0022-  
542 2836(05)80360-2
- 543 3. Arnason, J.T., Binns, S.E., Baum, B.R., 2002. Phytochemical diversity and  
544 biological activity in *Echinacea* phytomedicines: challenges to quality control  
545 and germplasm improvement. Phytochem. Nutr. Health 9.
- 546 4. Barnes, J., Anderson, L.A., Gibbons, S., Phillipson, J.D., 2005. *Echinacea* species  
547 (*Echinacea angustifolia* (DC.) Hell., *Echinacea pallida* (Nutt.) Nutt.,  
548 *Echinacea purpurea* (L.) Moench): a review of their chemistry, pharmacology  
549 and clinical properties. J. Pharm. Pharmacol. 57, 929–954.
- 550 5. Barnes, P.M., Bloom, B., Nahin, R.L., 2008. Complementary and alternative  
551 medicine use among adults and children: United States, 2007. Natl. Health  
552 Stat. Rep. 1–23.
- 553 6. Binns, S.E., Hudson, J., Merali, S., Arnason, J.T., 2002. Antiviral activity of  
554 characterized extracts from *Echinacea* spp. (Heliantheae: Asteraceae) against  
555 herpes simplex virus (HSV-I). Planta Med. 68, 780–783.
- 556 7. Brown, P.N., Chan, M., Paley, L., Betz, J.M., 2011. Determination of major  
557 phenolic compounds in *Echinacea* spp. raw materials and finished products by  
558 high-performance liquid chromatography with ultraviolet detection: single-  
559 laboratory validation matrix extension. J. AOAC Int. 94, 1400–1410.
- 560 8. CAMAG, 2015. CAMAG Application notes on HPTLC identification of *Echinacea*  
561 (*E. purpurea*, *E. angustifolia*, *E. pallida*) F-24A. URL  
562 [https://www.scribd.com/document/181382719/F-24a-echinacea-phenolics-  
563 HPTLC-Identification-of-Echinacea-pdf](https://www.scribd.com/document/181382719/F-24a-echinacea-phenolics-HPTLC-Identification-of-Echinacea-pdf). Accessed Jun 14 2017.
- 564 9. Cheng, X., Su, X., Chen, X., Zhao, H., Bo, C., Xu, J., Bai, H., Ning, K., 2014.  
565 Biological ingredient analysis of traditional Chinese medicine preparation  
566 based on high-throughput sequencing: the story for Liuwei Dihuang Wan. Sci.  
567 Rep. 4, 5147. doi:10.1038/srep05147
- 568 10. Coghlan, M.L., Haile, J., Houston, J., Murray, D.C., White, N.E., Moolhuijzen, P.,  
569 Bellgard, M.I., Bunce, M., 2012. Deep sequencing of plant and animal DNA



- 570 contained within traditional Chinese medicines reveals legality issues and  
571 health safety concerns. PLOS Genet 8, e1002657.
- 572 11. De Boer, H., Ichim, M.C., Newmaster, S.G., 2015. DNA barcoding and  
573 pharmacovigilance of herbal medicines. Drug Saf. 38, 611–620.
- 574 12. EAS, European Advisory Services, 2007. The use of substances with nutritional  
575 or physiological effect other than vitamins and minerals in food supplements.  
576 S [https://ec.europa.eu/food/sites/food/files/safety/docs/labelling\\_nutrition-](https://ec.europa.eu/food/sites/food/files/safety/docs/labelling_nutrition-supplements-2007_a540169_study_other_substances_en.pdf)  
577 [supplements-2007\\_a540169\\_study\\_other\\_substances\\_en.pdf](https://ec.europa.eu/food/sites/food/files/safety/docs/labelling_nutrition-supplements-2007_a540169_study_other_substances_en.pdf). Accessed June 1  
578 2017.
- 579 13. EDQM, Council of Europe, 2014. European Pharmacopoeia. 8th Edition.  
580 Strasbourg: Council of Europe. URL [https://www.edqm.eu/en/european-](https://www.edqm.eu/en/european-pharmacopoeia-8th-edition-1563.html)  
581 [pharmacopoeia-8th-edition-1563.html](https://www.edqm.eu/en/european-pharmacopoeia-8th-edition-1563.html). Accessed March 11 2016.
- 582 14. EMA, European Medicine Agency 2006. Guideline on specifications: test  
583 procedures and acceptance criteria for herbal substances, herbal preparations  
584 and herbal medicinal products (EMA/CPMP/QWP/2820/00 Rev. 2).  
585 [http://www.ema.europa.eu/docs/en\\_GB/document\\_library/Scientific\\_guideline](http://www.ema.europa.eu/docs/en_GB/document_library/Scientific_guideline/2011/09/WC500113210.pdf)  
586 [/2011/09/WC500113210.pdf](http://www.ema.europa.eu/docs/en_GB/document_library/Scientific_guideline/2011/09/WC500113210.pdf). Accessed May 22 2017.
- 587 15. Flagel, L.E., Rapp, R.A., Grover, C.E., Widrlechner, M.P., Hawkins, J.,  
588 Grafenberg, J.L., Álvarez, I., Chung, G.Y., Wendel, J.F., 2008. Phylogenetic,  
589 morphological, and chemotaxonomic incongruence in the North American  
590 endemic genus *Echinacea*. Am. J. Bot. 95, 756–765. doi:10.3732/ajb.0800049
- 591 16. Gilbert, N., 2011. Regulations: Herbal medicine rule book. Nature 480, S98–S99.  
592 doi:10.1038/480S98a
- 593 17. Heitmann, K., Havnen, G.C., Holst, L., Nordeng, H., 2016. Pregnancy outcomes  
594 after prenatal exposure to echinacea: the Norwegian mother and child cohort  
595 study. Eur. J. Clin. Pharmacol. 72, 623–630.
- 596 18. Hinchliff, C.E., Smith, S.A., 2014. Some limitations of public sequence data for  
597 phylogenetic inference (in plants). PLoS ONE 9.  
598 doi:10.1371/journal.pone.0098986
- 599 19. Ivanova, N.V., Kuzmina, M.L., Braukmann, T.W.A., Borisenko, A.V., Zakharov,  
600 E.V., 2016. Authentication of herbal supplements using next-generation  
601 sequencing. PLOS ONE 11, e0156426. doi:10.1371/journal.pone.0156426
- 602 20. Kindscher, K., Wittenberg, R., 2016. The Naming and Classification of *Echinacea*  
603 species, in: Kindscher, K. (Ed.), *Echinacea*. Springer International Publishing,  
604 pp. 37–45. doi:10.1007/978-3-319-18156-1\_4
- 605 21. Lammers, Y., Peelen, T., Vos, R.A., Gravendeel, B., 2014. The HTS barcode  
606 checkerpipeline, a tool for automated detection of illegally traded species from  
607 high-throughput sequencing data. BMC Bioinformatics 15, 44.
- 608 22. Loman, N.J., Misra, R.V., Dallman, T.J., Constantinidou, C., Gharbia, S.E., Wain,  
609 J., Pallen, M.J., 2012. Performance comparison of benchtop high-throughput  
610 sequencing platforms. Nat. Biotechnol. 30, 434–439. doi:10.1038/nbt.2198
- 611 23. Mistrikova, I., Vaverkova, S., 2006. *Echinacea*—chemical composition,  
612 immunostimulatory activities and uses. Thaiszia J Bot 16, 11–26.
- 613 24. Morlock, G., Schwack, W., 2010. Hyphenations in planar chromatography. J.  
614 Chromatogr. A, 1217, 6600–6609. doi:10.1016/j.chroma.2010.04.058
- 615 25. Newmaster, S.G., Grguric, M., Shanmughanandhan, D., Ramalingam, S.,  
616 Ragupathy, S., 2013. DNA barcoding detects contamination and substitution  
617 in North American herbal products. BMC Med. 11, 222.
- 618 26. Pawluczyk, M., Weiss, J., Links, M.G., Egaña Aranguren, M., Wilkinson, M.D.,  
619 Egea-Cortines, M., 2015. Quantitative evaluation of bias in PCR amplification



- 620 and next-generation sequencing derived from metabarcoding samples. Anal.  
621 Bioanal. Chem. 407, 1841–1848.
- 622 27. Raclariu, A.C., Mocan, A., Popa, M.O., Vlase, L., Ichim, M.C., Crisan, G.,  
623 Brysting, A.K., de Boer, H., 2017a. *Veronica officinalis* product authentication  
624 using DNA metabarcoding and HPLC-MS reveals widespread adulteration  
625 with *Veronica chamaedrys*. Front. Pharmacol. 8.
- 626 28. Raclariu, A.C., Paltinean, R., Vlase, L., Labarre, A., Manzanilla, V., Ichim, M.C.,  
627 Crisan, G., Brysting, A.K., De Boer, H., 2017b. Comparative authentication of  
628 *Hypericum perforatum* herbal products using DNA metabarcoding, TLC and  
629 HPLC-MS. Sci. Rep. 7, 1291. doi:10.1038/s41598-017-01389-w
- 630 29. Reich, E., Schibli, A., Debatt, A., 2008. Validation of high-performance thin-layer  
631 chromatographic methods for the identification of botanicals in a cGMP  
632 environment. J. AOAC Int. 91, 13–20.
- 633 30. Reich, E., Widmer, V., 2008. Plant analysis 2008 – planar chromatography. Planta  
634 Med. 75, 711–718. doi:10.1055/s-0028-1088389
- 635 31. Rossi Forim, M., Perlatti, B., Soares Costa, E., Facchini Magnani, R., Donizetti de  
636 Souza, G., 2015. Concerns and considerations about the quality control of  
637 natural products using chromatographic methods. Curr. Chromatogr. 2, 20–31.
- 638 32. Schwarz, E., Metzler, J., Diedrich, J.P., Freudenstein, J., Bode, C., Bode, J.C.,  
639 2002. Oral administration of freshly expressed juice of *Echinacea purpurea*  
640 herbs fail to stimulate the nonspecific immune response in healthy young men:  
641 results of a double-blind, placebo-controlled crossover study. J. Immunother.  
642 25, 413–420.
- 643 33. Schwarz, E., Parlesak, A., Henneicke-von Zepelin, H.-H., Bode, J.C., Bode, C.,  
644 2005. Effect of oral administration of freshly pressed juice of *Echinacea*  
645 *purpurea* on the number of various subpopulations of B- and T-lymphocytes in  
646 healthy volunteers: results of a double-blind, placebo-controlled cross-over  
647 study. Phytomedicine 12, 625–631.
- 648 34. Smith, T., Lynch, M., Johnson, J., Kawa, K., Bauman, H., Blumenthal, M., 2015.  
649 Herbal dietary supplement sales in US increase 6.8% in 2014. HerbalGram  
650 107, 52–59.
- 651 35. Sperber, S.J., Shah, L.P., Gilbert, R.D., Ritchey, T.W., Monto, A.S., 2004.  
652 *Echinacea purpurea* for prevention of experimental rhinovirus colds. Clin.  
653 Infect. Dis. 38, 1367–1371.
- 654 36. Staats, M., Arulandhu, A.J., Gravendeel, B., Holst-Jensen, A., Scholtens, I.,  
655 Peelen, T., Prins, T.W., Kok, E., 2016. Advances in DNA metabarcoding for  
656 food and wildlife forensic species identification. Anal. Bioanal. Chem. 408,  
657 4615–4630.
- 658 37. Taberlet, P., Coissac, E., Pompanon, F., Brochmann, C., Willerslev, E., 2012.  
659 Towards next-generation biodiversity assessment using DNA metabarcoding.  
660 Mol. Ecol. 21, 2045–2050.
- 661 38. Zhang, N., Erickson, D.L., Ramachandran, P., Ottesen, A.R., Timme, R.E., Funk,  
662 V.A., Luo, Y., Handy, S.M., 2017. An analysis of *Echinacea* chloroplast  
663 genomes: implications for future botanical identification. Sci. Rep. 7, 216.  
664 doi:10.1038/s41598-017-00321-6
- 665 39. Zhao, Z., Hu, Y., Liang, Z., Yuen, J.P.-S., Jiang, Z., Leung, K.S.-Y., 2006.  
666 Authentication is fundamental for standardization of Chinese medicines.  
667 Planta Med. 72, 865–874. doi:10.1055/s-2006-947209  
668  
669

670 **Figure legends**

671 **Figure 1.** High performance thin layer chromatogram (HPTLC) based identification  
672 and detection of phenylpropanoids from the *Echinacea* sp. herbal products. The track  
673 assignment: (1) test solutions (1-53) (2) phenylpropanoids chemical reference  
674 solutions in the following order (increasing Rf): echinacoside, chlorogenic acid,  
675 caftaric acid, cynarin, cichoric acid, caffeic acid; (3) botanical reference solution of  
676 *Echinacea purpurea* (root (MNR1) and aerial parts (MH1)) (4) United States  
677 Pharmacopoeia (USP) analytical reference botanical standards (*E. purpurea* (Spu), *E.*  
678 *angustifolia* (SA) and *E. pallida* (SP)) **A.** HPTLC chromatograms of herbal teas. **B.**  
679 HPTLC chromatograms of capsules. **C.** HPTLC chromatograms of tablets. **D.** HPTLC  
680 chromatograms of extracts. The chromatograms were scanned after derivatization in  
681 UV 366 nm. Details about the herbal products can be found in the Table A.3.

682

683 **Figure 2.** Detection of *Echinacea* sp. using DNA metabarcoding within the herbal  
684 products per category of pharmaceutical form.

685

686

687 **Appendix. Supplementary materials**

688 **Table S1** Use of medicinal *Echinacea* spp.

689 **Table S2** The main chemical constituents of *Echinacea* spp.

690 **Table S3** Information about the herbal products.

691 **Table S4** HPTLC results.

692 **Table S5** DNA and amplicon concentrations.

693 **Table S6** Overview of the results for 99 % clustering thresholds.

694 **Table S7** HTS reads and identified MOTUs per product.

695 **Table S8** Fidelity rate of the herbal products.

696

# Graphical Abstract

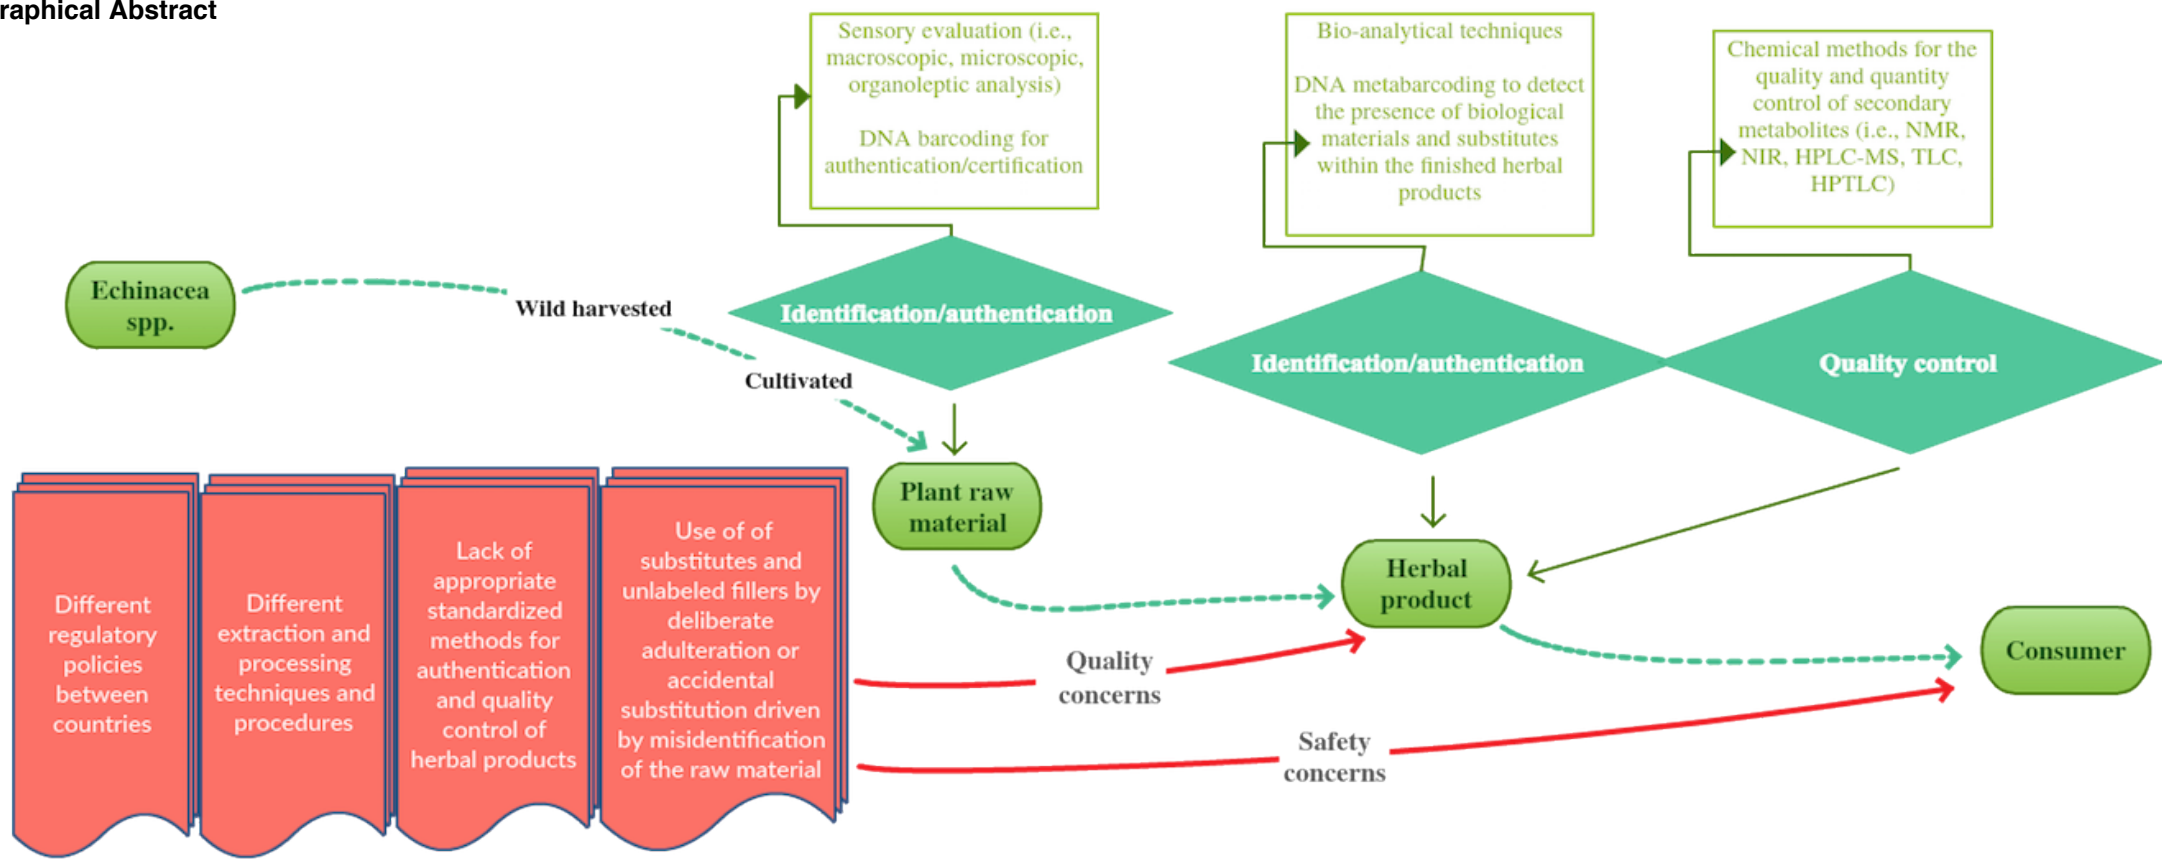

Figure 1A  
[Click here to download high resolution image](#)

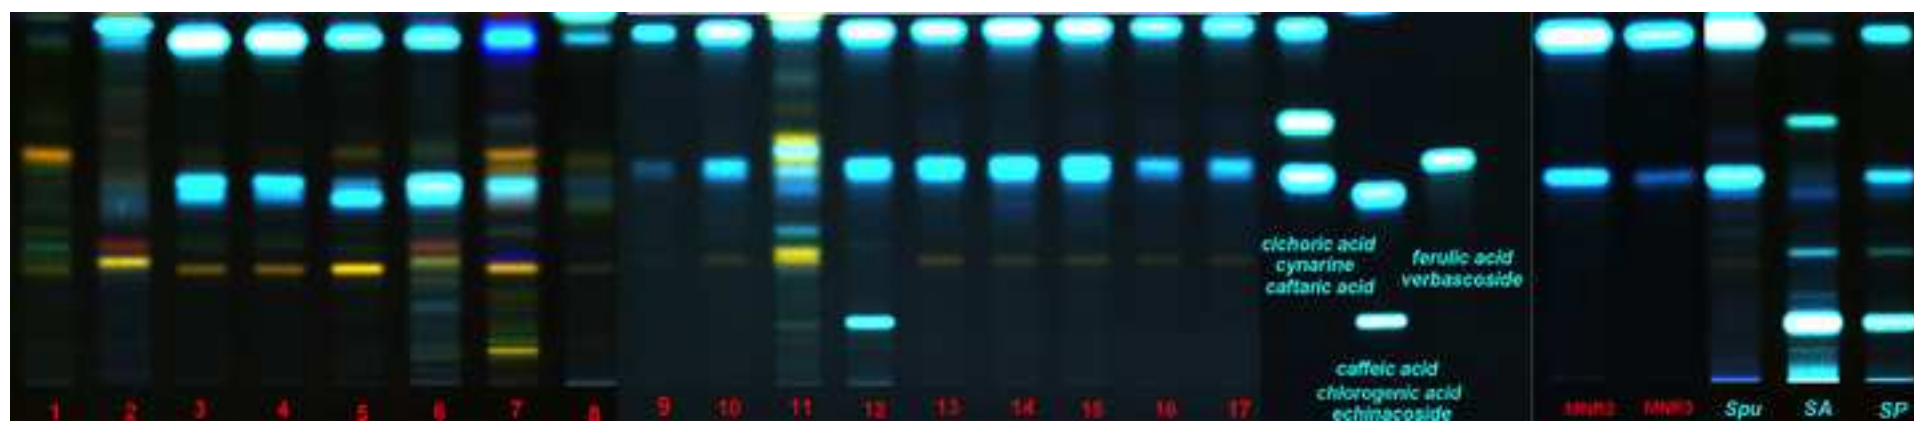

Figure 1B  
[Click here to download high resolution image](#)

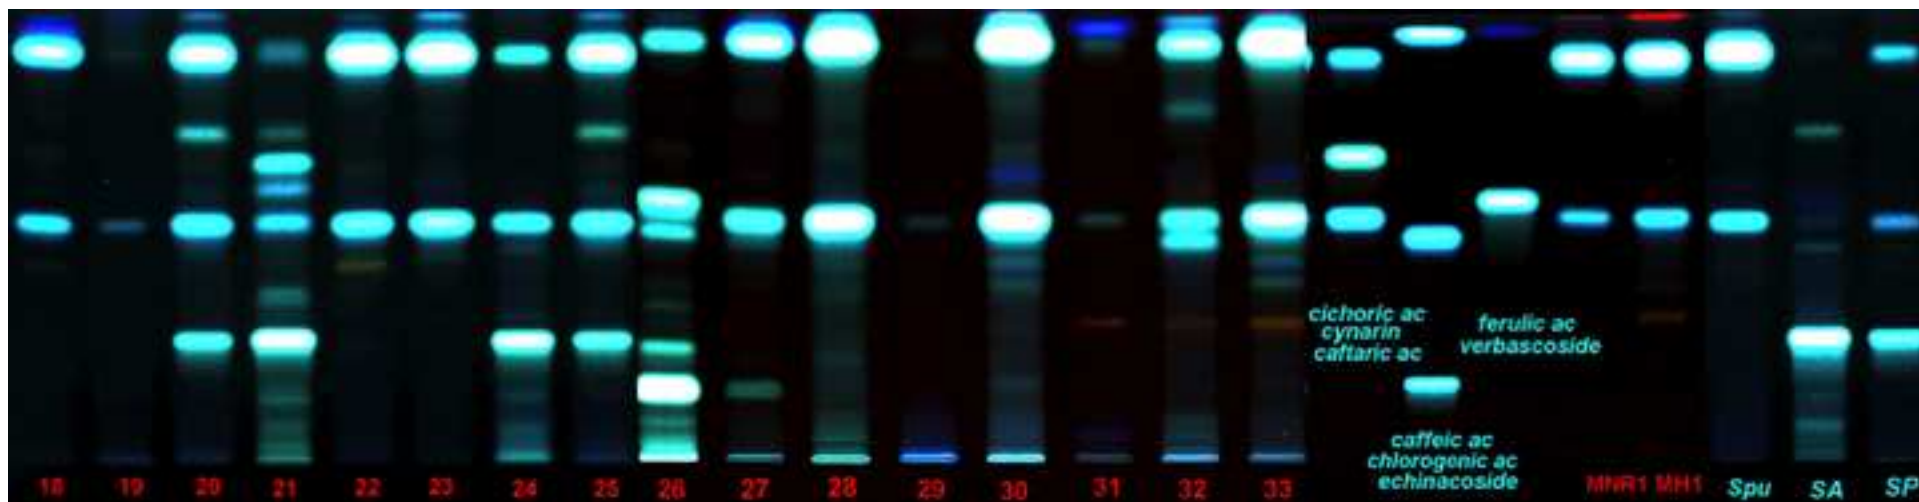



Figure 1C  
[Click here to download high resolution image](#)

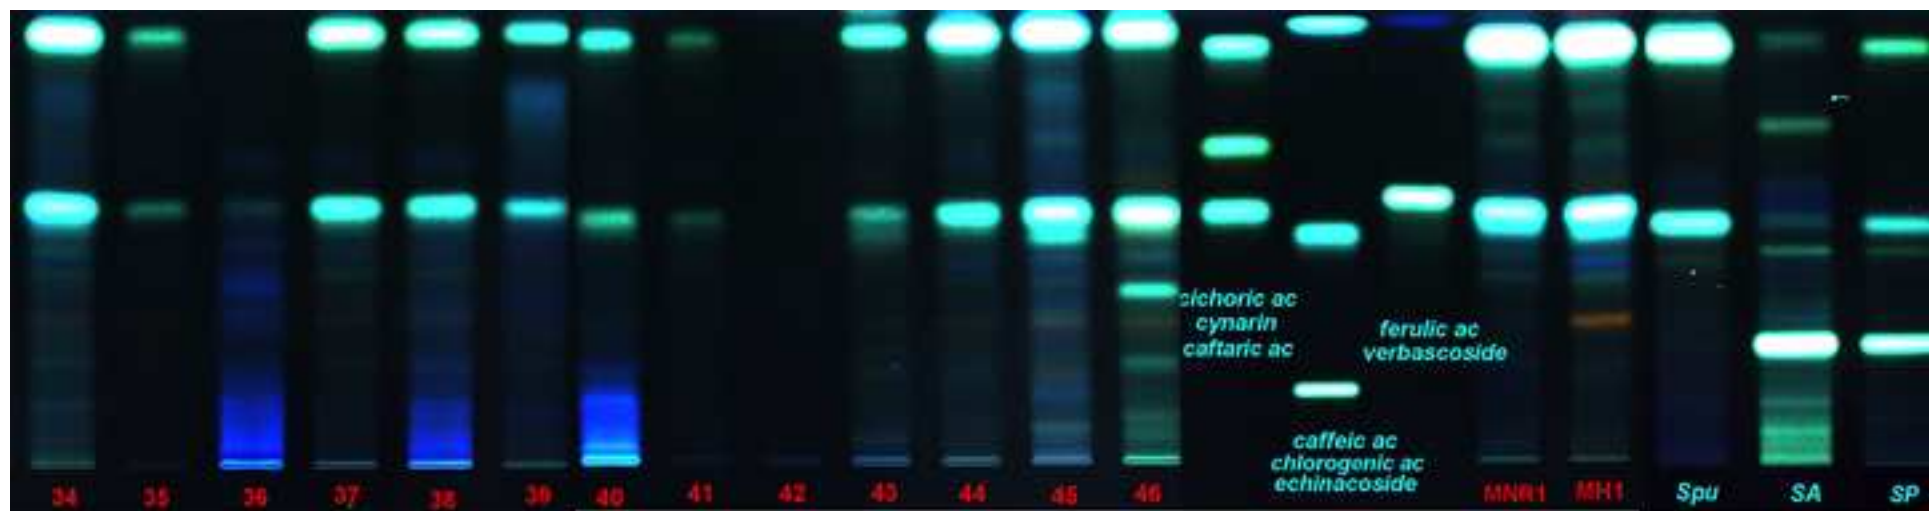

Figure 1D  
[Click here to download high resolution image](#)

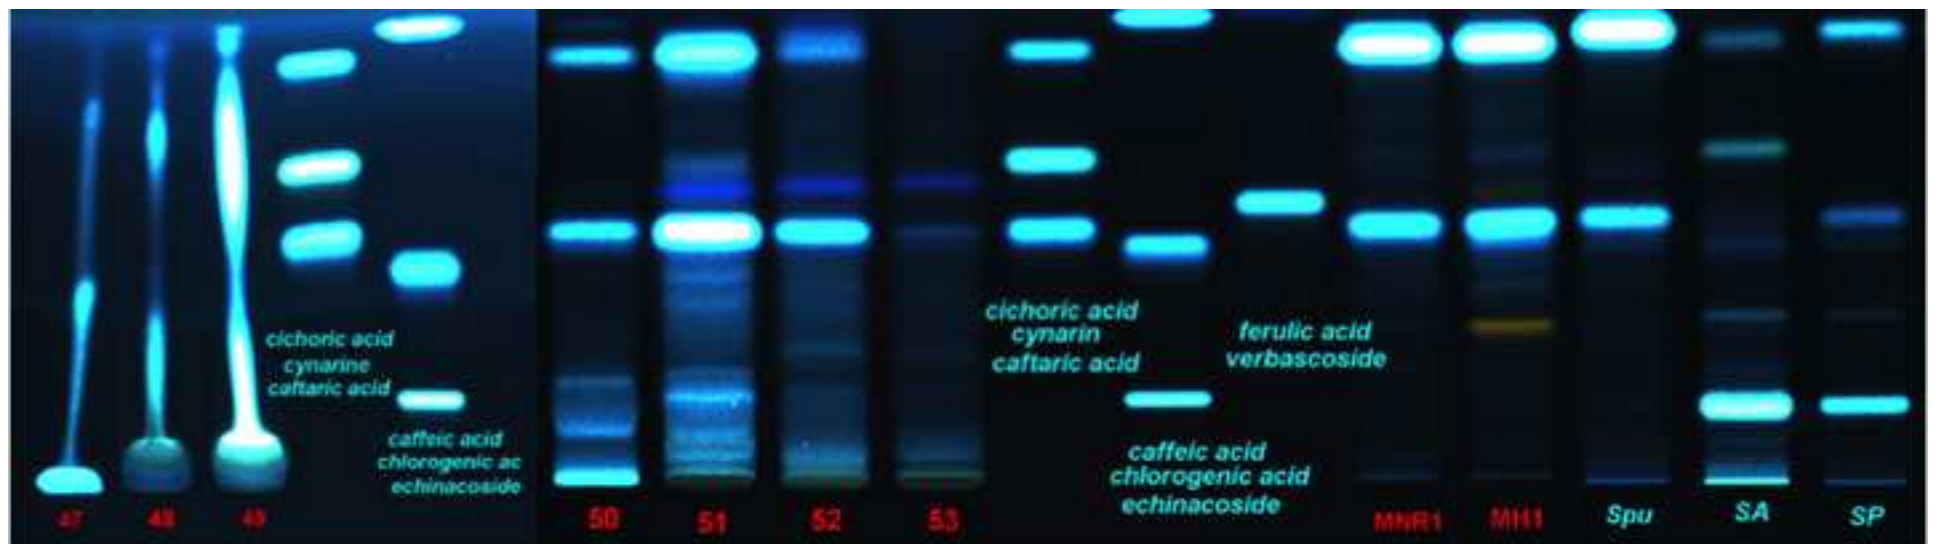

**Figure 2**

■ Products containing *Echinacea*    ■ *Echinacea* not detected    ■ Products with no MOTU

0%    10%    20%    30%    40%    50%    60%    70%    80%    90%    100%

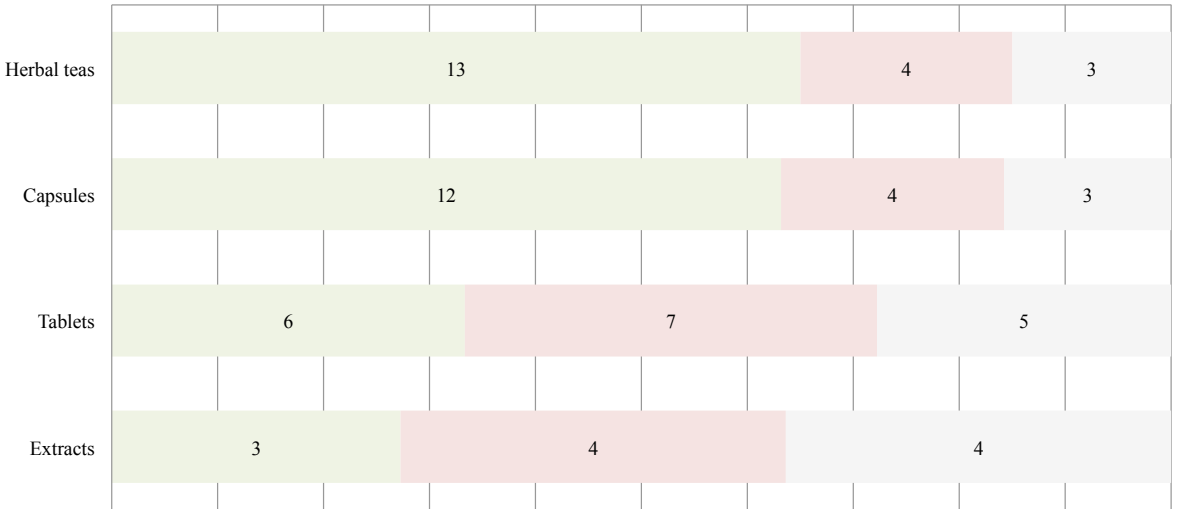

Source: https://www.biorxiv.org/content/10.1101/202721v1.full.pdf
